1 **Targeting glucose metabolism sensitizes pancreatic cancer to MEK inhibition**

2

3 Liang Yan<sup>1</sup>, Bo Tu<sup>1</sup>, Jun Yao<sup>1</sup>, Jing Gong<sup>2</sup>, Alessandro Carugo<sup>3</sup>, Christopher A. Bristow<sup>3</sup>,  
4 Qiuyun Wang<sup>1</sup>, Cihui Zhu<sup>1</sup>, Bingbing Dai<sup>4</sup>, Ya'an Kang<sup>4</sup>, Leng Han<sup>2</sup>, Ningping Feng<sup>3</sup>, Yanqing  
5 Jin<sup>1</sup>, Jason Fleming<sup>4,5</sup>, Timothy P. Heffernan<sup>3</sup>, Wantong Yao<sup>6</sup>, Haoqiang Ying<sup>1</sup>

6 <sup>1</sup> Department of Molecular and Cellular Oncology, University of Texas MD Anderson Cancer  
7 Center

8 <sup>2</sup> Department of Biochemistry and Molecular Biology, UTHealth Medical School

9 <sup>3</sup> Translational Research to Advance Therapeutics and Innovation in Oncology (TRACTION),  
10 The University of Texas MD Anderson Cancer Center, The University of Texas MD Anderson  
11 Cancer Center

12 <sup>4</sup> Surgical Oncology, The University of Texas MD Anderson Cancer Center

13 <sup>5</sup> Division of Gastrointestinal Oncology, H. Lee Moffitt Cancer Center

14 <sup>6</sup> Department of Translational Molecular Pathology, The University of Texas MD Anderson  
15 Cancer Center

16 Corresponding Author: Haoqiang Ying, MD Anderson Cancer Center, 1515 Holcombe Blvd,  
17 Houston, TX 77030, Phone: 713-563-3367; E-mail: [hying@mdanderson.org](mailto:hying@mdanderson.org); and Wantong  
18 Yao, MD Anderson Cancer Center, 1515 Holcombe Blvd, Houston, TX 77030. Phone: 713-  
19 563-4411; E-mail: [w Yao22@mdanderson.org](mailto:w Yao22@mdanderson.org)

20 Conflict of interest: The authors declare no potential conflicts of interest.

21 **Abstract**

22 Pancreatic ductal adenocarcinoma (PDAC) is almost universally lethal. A critical unmet need  
23 exists to explore essential susceptibilities in PDAC and identify druggable targets for tumor  
24 maintenance. This is especially challenging in the context of PDAC, in which activating  
25 mutations of KRAS oncogene (KRAS\*) dominate the genetic landscape. By using an inducible  
26 *Kras*<sup>G12D</sup>-driven *p53* deficient PDAC mouse model (iKras model), we demonstrate that RAF-  
27 MEK-MAPK signaling is the major effector for oncogenic Kras-mediated tumor maintenance.  
28 However, MEK inhibition has minimal therapeutic effect as single agent for PDAC both in  
29 vitro and in vivo. Although MEK inhibition partially downregulates the transcription of  
30 glycolysis genes, it surprisingly fails to suppress the glycolysis flux in PDAC cell, which is a  
31 major metabolism effector of oncogenic KRAS. Accordingly, In vivo genetic screen identified  
32 multiple glycolysis genes as potential targets that may sensitize tumor cells to MAPK inhibition.  
33 Furthermore, inhibition of glucose metabolism with low dose 2-deoxyglucose (2DG) in  
34 combination with MEK inhibitor dramatically induces apoptosis in *Kras*<sup>G12D</sup>-driven PDAC cell  
35 in vitro, inhibits xenograft tumor growth and prolongs the overall survival of genetically  
36 engineered mouse PDAC model. Molecular and metabolism analyses indicate that co-targeting  
37 glycolysis and MAPK signaling results in apoptosis via induction of lethal ER stress. Together,  
38 our work suggests that combinatory inhibition of glycolysis and MAPK pathway may serve as  
39 an alternative approach to target KRAS-driven PDAC.

40

41

## 42 **Introduction**

43 Pancreatic ductal adenocarcinoma (PDAC) is a highly aggressive malignancy with an  
44 overall 5-year survival of <10% and projected to be the second leading cause of cancer-related  
45 death by 2030 in the United States (1,2). PDAC is almost universally driven by mutationally  
46 activated KRAS, which represents the earliest and the most frequent (>90%) genetic alteration.  
47 However, no effective inhibitors have been developed for mutant KRAS due to the lack of  
48 suitable pockets except for small molecule inhibitors targeting KRAS<sup>G12C</sup>, which is present in  
49 just 1.5% human PDAC (3-5). To date, no targeted therapy has shown any major effect in  
50 PDAC patients yet.

51 KRAS mutation activates several downstream signaling pathways, including, but not  
52 limited to, the RAF/MEK/MAPK, phosphatidylinositol 3-kinase (PI3K)/AKT, and RalGDS  
53 pathways (6). Consequently, multiple cellular processes are activated such as proliferation,  
54 survival and KRAS-dependent metabolism pathways (7,8). However, not all of the pathways  
55 are activated by oncogenic KRAS simultaneously in any given tumor types. It is likely that a  
56 subset of KRAS surrogates play dominant roles during tumor maintenance. While several  
57 studies have established the roles of KRAS surrogates during PDAC initiation and  
58 development (5,9,10), the requirement of these pathways for tumor maintenance has not been  
59 thoroughly investigated. Recently, study using genetically engineered mouse (GEM) models  
60 indicates that C-RAF is required for the maintenance of Kras-driven lung adenocarcinomas  
61 (11).

62 Therapeutically, single agent targeting the MAPK or PI3K pathway has shown limited  
63 effects in PDAC (12,13). Although co-targeting MEK and PI3K pathways showed beneficial  
64 effect in preclinical models, the combination is too toxic to be used in clinic, indicating the  
65 need to identify alternative combination strategies. By using a PDAC GEM model driven by  
66 inducible *Kras*<sup>G12D</sup> (iKras model), we have established the critical roles of metabolism  
67 reprogramming in advanced tumors (14). Interestingly, recent studies have demonstrated the  
68 synergy between targeting metabolism pathways such as autophagy (15,16) or nucleoside  
69 metabolism (17) with MAPK inhibition in PDAC treatment, underscoring the therapeutic  
70 potential of co-targeting KRAS signaling and metabolism programs.

71 In this study, we conducted genetic studies to establish the dominant role of RAF-MAPK  
72 signaling, but not PI3K or RalGDS pathways, for KRAS-dependent PDAC maintenance.  
73 However, MAPK inhibition alone fails to suppress the glycolysis flux induced by oncogenic  
74 KRAS. Accordingly, genetic or pharmacological inhibition of glycolysis synergizes with  
75 MAPK inhibition to suppress PDAC growth both in vivo and in vitro. Moreover, molecular  
76 studies revealed that the synergistic effect is largely due to the induction of lethal ER stress and  
77 apoptosis. Our study identified the co-inhibition of MAPK signaling and glycolysis flux as an  
78 alternative approach to target KRAS-driven PDAC.

## 79 **Material and methods**

### 80 **Animals**

81 All animal manipulations were approved by the Animal Care and Use Committees at The  
82 University of Texas, MD Anderson Cancer Center under protocol number 00001549. No

83 patient samples were directly used in this study. *TetO\_Lox-Stop-Lox-Kras<sup>G12D</sup>*  
84 (*tetO\_LKras<sup>G12D</sup>*), *ROSA26-LSL-rtTA-IRES-GFP (ROSA\_rtTA)*, *p48-Cre* and *Trp53<sup>L</sup>* strains  
85 were described previously (18). Mice were fed with doxy water (Dox 2g/L in sucrose 20g/L)  
86 starting at the 3-week-old to induce PDAC development. For drug treatment, 10-week-old mice  
87 were treated by oral gavage delivery of Trametinib (1mg/kg/day), by intraperitoneal injection  
88 of 2DG (1000mg/kg/d) or both drugs together.

### 89 **Cell culture and reagents**

90 IMR90 and human PDAC cell lines HPAC, 8988T, PaTu8902, Miapaca2, DanG, S2013, and  
91 PANC1 were purchased from American Type Culture Collection (ATCC). PDX148 was  
92 established from PDX tumors (19). IMR90 was grown in Eagle's Minimum Essential Medium  
93 with 10% FBS. All human PDAC cell lines and PDX148 cells were cultured in RPMI1640  
94 supplemented with 10% FBS. Mouse PDAC cultures derived from the iKras/p53 and LSL-  
95 Kras/p53 models were cultured in RPMI1640 supplemented with 10% Tetracycline Negative  
96 FBS (Gemini Bio Products). Trametinib, SCH772984, BKM120, GDC-0623, gemcitabine, and  
97 paclitaxel were purchased from Selleckchem. 4-Phenylbutyric Acid (4-PBA) and 2DG were  
98 obtained from Sigma Aldrich.

### 99 **Plasmids and reagents**

100 The lentiviral shRNA clones targeting mouse aldolase A and nontargeting shRNA control were  
101 obtained from Sigma Aldrich in the pLKO vector. The clone IDs and sequences for shRNA are  
102 listed in the Supplementary Table S2. All ORFs were cloned into pHAGE-IRES-GFP using  
103 pENTR™/D-TOPO™ Cloning Kit (Thermofisher Scientific). The virus package plasmids

104 psPAX2 (Addgene plasmid 12260) and pMD2.G (Addgene plasmid 12259) were purchased  
105 from Addgene.

### 106 **Glucose consumption and lactate production by YSI**

107 Cells were seeded in 12-well plate at ~30% confluence (blank wells without cells were used  
108 for a baseline reading of Glucose/lactate). Forty-eight hours later, the culture medium was  
109 collected from each well and spinned at 1000g for 5min at 4°C. 250 µl supernatant was  
110 transferred into 96-well plate and read on YSI (Agilent). The number of cells in the 12-well  
111 plate was counted for normalization.

### 112 **Analysis of oxygen consumption rate (OCR) and glycolytic rate (ECAR) by Seahorse XF**

#### 113 **Analyzers**

114 The determination of OCR or ECAR values was performed on XF96 analyzers. The iKras cells  
115 were seeded at a density of  $1 \times 10^4$  each well in Seahorse XF96 Cell Culture Microplate. The  
116 cells were washed twice with PBS on the second day and treated as Dox ON, Dox OFF or with  
117 Dox ON/TRA. After 24 h treatment, the cells were washed and cultured in Agilent Seahorse  
118 XF Base Medium, and the OCR or ECAR values were detected with Seahorse XF Cell Mito  
119 Stress Test following the manufacturer's instruction. After seahorse analysis, the cells in 96-  
120 well plate were fixed with 4% paraformaldehyde for 15min, stained with DAPI and counted  
121 on Operetta High-Content Imaging System. The OCR and ECAR were normalized to the cell  
122 number in each well.

#### 123 **Quantitative RT-PCR**

124 Total RNA was extracted by the Qiagen RNeasy kit following the manufacturer's instruction.  
125 cDNA was generated by using the SuperScript IV First-Strand Synthesis System (Invitrogen).  
126 The qRT-PCR was performed with Fast SYBR Green Master Mix (Applied Biosystems) in 96-  
127 well format in StepOnePlus (Applied Biosystems). Relative expression of genes was calculated  
128 by  $2^{-\Delta\Delta CT}$  method and normalized to beta-actin expression. All the used primers are listed in  
129 Supplementary Table S3.

### 130 **In vivo shRNA screen**

131 The construction of customized shRNA library and method for shRNA screen in vivo were  
132 previously described (20,21). Briefly, targeting sequences of shRNA were designed using a  
133 proprietary algorithm (Collecta) and 10 shRNA targeting each gene were included in the library.  
134 The pooled shRNA was cloned into the pRSI16 lentiviral vector by using chip-based  
135 oligonucleotide synthesis. The oligonucleotide corresponding to each shRNA was synthesized  
136 with a unique molecular barcode (18 nucleotides) for measuring representation by next-  
137 generation sequencing. To perform the shRNA screen, the lentivirus package was prepared in  
138 293FT cells using the second-generation packaging plasmids psPAX2 and pMD2.G. The  
139 lentivirus was concentrated using ultracentrifuge at 23,000 rpm for 3 h and the transducing unit  
140 was determined. The lentivirus infection was performed at ~0.3 transducing unit/cell with 10  
141  $\mu\text{g/ml}$  polybrene. After puromycin selection (2  $\mu\text{g/ml}$ ) for 48 h, cells were trypsinized, pooled  
142 together and  $10^6$  cells were washed with PBS and stored in  $-80^\circ\text{C}$  as reference. The remaining  
143 cells were mixed with matrigel (1:1) and orthotopically injected at  $10^6$  cells/mouse pancreas.

144 The screen was conducted in triplicates and an in vivo coverage of 1000 cells/barcode was  
145 guaranteed. The tumors were collected 10 days post injection and stored at -80°C.

#### 146 **Extraction of tumor DNA and NGS library preparation**

147 The frozen tumors were minced to small pieces and suspended in buffer P1 (QIAGEN, 1 mL  
148 Buffer/100 mg tumor) supplemented with 100 µg/mL RNase A (Promega). The dissociation of  
149 the tumor performed in disposable gentleMACS M tubes (Miltenyi Biotech) with the  
150 gentleMACS dissociator (Miltenyi Biotec). The cell pellet was suspended in buffer P1/RNase  
151 A and lysed by adding 1/20 volume of 10% SDS (Promega). After incubating for 20 min at  
152 room temperature, the lysates were passed 10-15 times through a 22-gauge syringe needle to  
153 shear the genomic DNA. Then the genomic DNA were extracted using the Phenol-Chloroform  
154 solution. The DNA pellet was finally dissolved over-night in UltraPure distilled water  
155 (Invitrogen) and DNA concentration was assessed by NanoDrop 2000 (Thermo Scientific). To  
156 prepare the NGS libraries, the barcodes were amplified from the equal amount of genomic  
157 DNA by 2 rounds of nested PCR. The primers are list in Supplementary Table S4. The required  
158 adapters for NGS were introduced in the second PCR reactions. Amplified PCR products were  
159 purified using QIAquick gel extraction kit (Qiagen) and quantified using High Sensitivity DNA  
160 Assay (Agilent Technologies) for the Agilent 2100 Bioanalyzer.

#### 161 **Screen data analysis**

162 The shRNA screen data was analyzed as described previously (20,21). Illumina base calls were  
163 processed using CASAVA (v.1.8.2), and resulting reads were processed using our in-house



164 pipeline. Following filtration and library-size normalization, reads counts in Vehicle or TRA  
165 samples were compared to the reference and a Log2 fold change was calculated.

## 166 **TEM**

167 Cells were cultured in 12-well plate and washed with PBS twice before fixed with a solution  
168 containing 3% glutaraldehyde and 2% paraformaldehyde in 0.1 M cacodylate buffer (pH 7.3).  
169 Samples were then washed in 0.1 M sodium cacodylate buffer, treated with 0.1% Millipore-  
170 filtered cacodylate buffered tannic acid, post-fixed with 1% buffered osmium and stained with  
171 0.1% Millipore-filtered uranyl acetate. The samples were dehydrated in increasing  
172 concentrations of ethanol and then infiltrated and embedded in LX-112 medium. The samples  
173 were then polymerized in a 60°C oven for three days. Ultrathin sections were cut using a Leica  
174 Ultracut microtome (Leica, Deerfield, IL) and then stained with uranyl acetate and lead citrate  
175 in a Leica EM Stainer. The stained samples were examined in a JEM 1010 transmission  
176 electron microscope (JEOL USA, Inc., Peabody, MA) using an accelerating voltage of 80 kV.  
177 Digital images were obtained using an AMT imaging system (Advanced Microscopy  
178 Techniques Corp., Danvers, MA).

## 179 **Cell Viability Assay**

180 Cells were plated in equal number in 24 well plates and treated with 2DG, Trametinib or  
181 combination. After 4 days' treatment, cells were rinsed twice with PBS to eliminate the floating  
182 cells and stained by Crystal Violet Staining Solution (0.25% Crystal violet in 20% methanol)  
183 for 20 min. The staining solution was removed and cells were washed with water. Stained cells  
184 were dried at room temperature and scanned. To quantify the relative cell numbers, cells were

185 destined with 10% Acetic acid and absorbance was measured at 595 nm at appropriate  
186 dilutions. The Bliss Score for the combination was calculated by online tools  
187 (<https://synergyfinder.fimm.fi/>).

#### 188 **Annexin V-PE and 7-AAD apoptosis assay**

189 Induction of cell apoptosis was detected by PE Annexin V Apoptosis Detection Kit I (BD  
190 Pharmingen™) following the manufacturer's instruction. Briefly, cells were seeded into 12-  
191 well plate at a density of 20000 cells/well and treated with the indicated concentration of 2DG,  
192 Trametinib or combination for 48 h. Then all the cells in each well were collected in 15ml tube  
193 and were pelleted by 200 g for 4 min. The supernatant was removed and cells were washed  
194 with PBS once. The cells were resuspended in the 100  $\mu$ l 1 $\times$ staining buffer in which 5  $\mu$ l  
195 antibody and 5  $\mu$ l 7-AAD were added. After staining at room temperature for 15 min, the  
196 samples were analyzed on Gallios Flow Cytometer (Beckman Counter). The FACS data were  
197 analyzed with FlowJo.

#### 198 **Xenograft**

199 For orthotopic xenografts,  $5 \times 10^5$  cells suspended in 10  $\mu$ l 50% Corning Matrigel Matrix  
200 (Corning)/Opti-MEM media were injected into the pancreas of NCr nude mice.

201 For Sub-Q xenografts,  $1 \times 10^6$  cells suspended in 100  $\mu$ l Opti-MEM media were injected  
202 subcutaneously into the lower flank of NCr nude mice. Animals were fed with doxy water and  
203 treated with Trametinib (1mg/kg/d), 2DG (1000mg/kg/d) or combination. Tumor volumes and  
204 body weight were measured every three days starting from Day 4 postinjection and calculated  
205 using the formula (Volume =  $0.5 \times \text{length} \times \text{width}^2$ ).

206 **RNA sequencing**

207 For the tumor samples, the mice were randomized into three groups (Kras-ON/Vehicle, Kras-  
208 OFF/Vehicle, Kras ON/TRA) on the 7<sup>th</sup> day after orthotopic injection. After 1 or 3 days of  
209 treatment, the tumors were collected for RNA extraction. For the cell samples,  $5 \times 10^5$  iKras cell  
210 were seeded in the 10cm dish and started the treatment with vehicle, 1 mM 2DG, 25 nM TRA,  
211 or combination for 24 h. The RNA samples were collected in the TRIzol™ Reagent  
212 (1ml/10cm<sup>2</sup>).

213 Total RNA was extracted using the Qiagen RNeasy kit following the manufacturer's instruction.  
214 The RNA samples with a RIN score >8 were used in further analysis. RNA library preparation,  
215 sequencing, raw data processing, and quality control were performed by Advanced Technology  
216 Genomics Core at MD Anderson Cancer Center. Reads were mapped using Tophat and FPKM  
217 values were generated with Cufflinks. The software package LIMMA (Linear Models for  
218 Microarray Data) was applied to detect significantly differentially expressed genes using  
219 Benjamini-Hochberg adjusted p-values.

220 **Immunohistochemistry and Western Blot Analysis**

221 Tissues were fixed in 10% formalin overnight and embedded in paraffin.  
222 Immunohistochemical analysis was performed as described (22). Antibodies used for  
223 immunohistochemistry and WB were listed in Supplementary Table S5 and Table S6.

224 **Statistical analysis**

225 To assess variance differences across various test groups, the data were analyzed using multiple  
226 t-tests in GraphPad Prism. Other comparisons were performed by using the unpaired 2-tailed

227 t-test. For all figures with error bars, data are presented as mean  $\pm$  SD unless otherwise stated.

228 Tumor volume and tumor-free survival results were analyzed using GraphPad Prism. The level

229 of significance was set at for p-value<0.01(\*\*) or p-value <0.05 (\*) in all figures.

230

## 231 **Results**

### 232 **Active MAPK pathway is essential for PDAC maintenance**

233 Our previous study has established the essential role of oncogenic KRAS for PDAC

234 maintenance (14). To dissect the respective contributions of KRAS downstream pathways in

235 tumor maintenance, three effector domain missense mutants of KRAS, which preferentially

236 activate RAF/MEK/ERK pathway, PI3K pathway or RalGDS respectively (23,24), were

237 ectopically expressed in the primary tumor cells derived from the iKras model (*p48Cre*;

238 *tetO\_Kras<sup>G12D</sup>*; *Rosa\_rtTA<sup>L/+</sup>*; *p53<sup>L/+</sup>*) (Fig. 1A). Using GFP as a negative control, complete

239 tumor regression was observed upon *Kras<sup>G12D</sup>* inactivation following doxycycline (Dox)

240 withdrawal in orthotopic xenografts, indicating iKras line may serve as a powerful model to

241 dissect the respective contributions of *Kras* downstream pathways for tumor maintenance (Fig.

242 1B). Interestingly, the *Kras<sup>G12V/T35S</sup>*, which selectively activates the RAF/MAPK pathway (Fig.

243 S1A), functions as potent as the endogenous *Kras<sup>G12D</sup>*, to maintain xenograft tumor growth

244 following doxycycline withdrawal (Fig. 1B). In contrast, *Kras<sup>G12V/Y40C</sup>* (activates PI3K) or

245 *Kras<sup>G12V/E37G</sup>* (activates RalGDS) (Fig. S1A) was less efficient to maintain the tumor growth

246 upon extinction of the endogenous *Kras<sup>G12D</sup>*. In consistent with the in vivo observation, the

247 induction of sphere formation by *Kras<sup>G12V/T35S</sup>* in the absence of endogenous *Kras<sup>G12D</sup>* is

248 comparable with Kras<sup>G12V</sup>. However, the number of spheres was reduced by about 90% if  
249 Kras<sup>G12V/Y40C</sup> or Kras<sup>G12V/E37G</sup> was expressed in iKras cells in the absence of doxycycline (Fig.  
250 1C-D). Therefore, our data implicates the dominant role of RAF/MAPK signaling for KRAS-  
251 driven PDAC maintenance.

252 To further dissect the KRAS effector pathways in advanced tumors, we conducted gain of  
253 function experiments using several constitutively activated mutants for the key effectors in  
254 MAPK, PI3K or RalGDS pathway (Fig. S1B-C). Consistent with our findings with the KRAS  
255 effector mutants, our data indicated that the constitutively activated C-Raf<sup>W22</sup>, BRAF<sup>V600E</sup>, and  
256 MEK<sup>DD</sup> (25) were as efficient as mutant Kras to sustain tumor sphere formation in vitro and  
257 maintain tumor growth in vivo in the absence of doxycycline (Fig. 1E-G). In contrast,  
258 constitutive active PI3K<sup>H1047R</sup> was less competent to support tumor sphere growth and induced  
259 much delayed tumor formation compared to the constitutive active mutants of the RAF/MAPK  
260 pathway components (Fig. 1F-G and S1D). Additionally, in the absence of doxycycline, iKras  
261 cells expressing Myr-AKT or constitutive active RalGDS (RalA<sup>Q75L</sup> or RalB<sup>Q72L</sup>) failed to  
262 exhibit tumorigenic activity in vitro or in vivo (Fig. 1F-G and S1D). Together, our data  
263 indicates that RAF-MAPK signaling is the major pathway for KRAS-mediated PDAC  
264 maintenance.

### 265 **Inhibition of MAPK pathway fails to recapitulate glycolysis inhibition upon** 266 **KRAS inactivation.**

267 Despite the essential role of MAPK pathway in PDAC maintenance, blocking MAPK  
268 signaling with MEK inhibitors has been shown to exert marginal impact on tumor growth or

269 overall survival in both preclinical models and PDAC patients (12,13,26-28). Although the  
270 feedback activation of multiple RTKs and their downstream PI3K pathway has been shown to  
271 mediate the resistance to MPAK inhibition in KRAS-driven PDAC (12,13), co-targeting  
272 MAPK and PI3K is too toxic in PDAC patients despite the anti-tumor effect of this combination  
273 in preclinical model (12). In an effort to further explore potential MAPK co-inhibition targets,  
274 we leveraged the unique ability of the iKras model to genetically extinct oncogenic Kras in  
275 advanced tumors and conducted global transcriptomic analysis to identify KRAS downstream  
276 effector pathways/activities that are not affected by MAPK inhibition. Specifically, RNAseq  
277 analysis was performed in orthotopic xenograft tumors established with primary tumor lines  
278 from the iKras/p53 model to compare the transcriptomic profiles following KRAS extinction  
279 or MEK inhibitor (MEKi) treatment for 1 or 3 days (Fig. 2A-B).

280 The principal component analysis (PCA) revealed high concordance among the three  
281 biological replicates within each treatment group. Notably, a progressing shift was observed in  
282 Dox OFF 1-day, and 3-day tumors compared to ON Dox tumors, indicating the time-dependent  
283 transcriptomic change following KRAS extinction. However, such gradual expression changes  
284 were not observed in Trametinib-treated tumors (Fig. 2C), prompting the hypothesis that the  
285 pathways downstream of oncogenic KRAS that are not affected by treatment with MEKi could  
286 serve as coextinction targets that may cooperate with MEKi to recapitulate the impact of KRAS  
287 extinction. To this end, we conducted Ingenuity Pathway Analysis (IPA) on the differentially  
288 expressed genes in the Dox OFF group or the Trametinib treated group while compared with  
289 the Dox ON group. Half of the top-ten differentially expressed pathways preferentially

290 enriched in OFF Dox tumors are associated with chromosomal replication or cell cycle control  
291 (Fig. 2D and Fig. S2A), consistent with previous findings from an induced NRAS-driven  
292 melanoma mouse model (29). Interestingly, rest of the differentially enriched pathways are  
293 metabolism processes that we have previously shown to be driven by oncogenic KRAS in  
294 PDAC mouse models (14), including glucose metabolism and cholesterol biosynthesis (Fig.  
295 2D). As shown in the clustered heatmap, compared to the dramatic downregulation of genes in  
296 glucose metabolism and cholesterol biosynthesis pathways, Trametinib treatment partially  
297 decreases the expression of these metabolism genes (Fig. 2E). In addition, Trametinib treatment  
298 also failed to recapitulate the induction of amino acid and fatty acid degradation pathways  
299 following KRAS inactivation (Fig. S2B).

300 Next, we employed different biochemical assays to determine the differential impact of  
301 KRAS extinction and MEK inhibition on glycolysis activity in mouse PDAC cells from the  
302 iKras/p53 model. Upon KRAS inactivation, glucose consumption or lactate production in the  
303 medium was dramatically downregulated, which is further supported by the decrease of  
304 extracellular acidification rate (ECAR) as measured with Seahorse. Surprisingly, no significant  
305 decrease in glucose consumption or lactate production was detected when the cells were treated  
306 with Trametinib for 2 days (Fig. 2F-G). Moreover, Seahorse analysis showed that Trametinib  
307 treatment lead to a mild induction of ECAR compared with the iKras/p53 tumor cells grown in  
308 the presence of doxycycline (Fig. 2H and Fig. S2C-D). Accordingly, MEK inhibition also  
309 failed to suppress the glucose uptake and lactate production in human PDAC cell lines (Fig.  
310 S2E-F). BKM120, a selective PI3K inhibitor, was able to reverse the AKT activation induced

311 by Trametinib treatment and impaired the glucose consumption and lactate production (Fig. 2I  
312 and S2G), indicating that the sustaining of glycolysis activity upon MEK inhibition is PI3K-  
313 AKT-dependent in iKras cell. Together, our transcriptomic analysis and biochemical analysis  
314 indicate that MEK inhibition alone is not sufficient to suppress the KRAS-mediated glycolysis  
315 flux in PDAC cells, likely due to the feedback activation of PI3K signaling.

### 316 **Pooled shRNA library screening indicates glycolysis inhibition sensitizes iKras** 317 **cells to MEK inhibition**

318 To identify the metabolism genes that may sensitize Kras-driven PDAC cell to MEK  
319 inhibition upon depletion, we performed a pool-based in vivo loss-of-function screen in the  
320 orthotopic xenograft model as previously described (21). A customized bar-coded shRNA  
321 library comprising ~3,400 shRNAs targeting ~340 metabolism genes, including those KRAS-  
322 dependent metabolism genes (14) was packaged into lentivirus and infected iKras/p53 mouse  
323 PDAC cells. Orthotopic xenograft tumors were established in the nude mice and were treated  
324 with vehicle or Trametinib for 10 days before collection for next-generation sequencing. The  
325 log fold change (logFC) of bar-coded shRNA in the control or Trametinib-treated xenograft  
326 was calculated by comparison with reference group which was composed of library infected  
327 cells collected before orthotopic injection (Fig. 3A). In both control and Trametinib-treated  
328 xenograft, the positive control shRNA targeting PMSA1 and RPL30 are most depleted  
329 compared with the reference which indicates a high reliability of our screen system. Using  
330 logFC=-1 as a cut-off value, we obtained 36 candidate genes that were selectively depleted in  
331 MEKi-treated xenograft tumors compared to the control untreated ones (Supplementary Table



332 S1). The depleted genes were most enriched in the glycolysis pathway (Fig. 3B), including  
333 Aldoa, Gapdhs, Hk2, Eno1 and PfkP (Fig. 3C-D).

334 To validate the hits, we knocked down Aldoa in the iKras/p53 PDAC cells with shRNA  
335 (Fig. 3E). While knockdown of Aldoa itself has a limited effect on the cell growth, Aldoa-  
336 depleted cells are more sensitive to MEK inhibition compared with control cells, approximating  
337 the inhibitory effect on cell growth following KRAS inactivation (Fig. 3F-G). Together, our  
338 data suggests that glycolysis inhibition may sensitize the KRAS-driven PDAC cells to MEK  
339 inhibition.

### 340 **Glycolysis inhibition with 2DG synergizes with MEK inhibition to induce PDAC** 341 **cell apoptosis**

342 To test if pharmacological inhibition of glycolysis will synergize with MEK inhibition in  
343 KRAS-driven PDAC cells, we combined a well-known glycolysis inhibitor 2-deoxy- glucose  
344 (2DG) with Trametinib to treat iKras/p53 PDAC cells. While either 2DG or Trametinib  
345 treatment alone failed to significantly suppress cell growth, the combination dramatically  
346 decreased the proliferation of mouse PDAC cells from the iKras/p53 and LSL-Kras/p53 models,  
347 as well as human PDAC cell lines, including HPAC and Patu8902 cells (Fig. 4A-B).  
348 Interestingly, no synergistic effect was observed in normal lung fibroblast IMR90 (Fig. 4A-B),  
349 implicating a therapeutic window for such combination therapy. To evaluate the synergy over  
350 a broad range of 2DG and Trametinib concentration, we computed the Bliss independence  
351 score for Trametinib and 2DG combination in PDAC cell lines. The strong synergistic effect  
352 was indicated by a high positive score (=29.014) in the iKras/p53 PDAC cells but not in IMR90

353 cell (Bliss score=0.57) (Fig. 4C-D). The synergy between 2DG and Trametinib was also  
354 recapitulated in additional mouse LSL-Kras/p53 PDAC cells and human PDAC cells, including  
355 HPAC, and 8988T cells (Fig. 4E and Fig. S3A). Moreover, strong synergy was also observed  
356 between 2DG and additional MEK inhibitor GDC0623 or ERK inhibitor sch772984 (Fig. 4F  
357 and Fig. S3B). On the other hand, a low Bliss synergy score was observed when iKras cell line  
358 was treated with 2DG in combination with chemotherapy agents, such as gemcitabine or  
359 paclitaxel (Fig. 4G). Therefore, our data indicates that inhibition of glycolysis with 2DG  
360 specifically sensitizes PDAC cells to MAPK inhibition. Such synergy is due to the significant  
361 induction of apoptosis as shown by the increase in Annexin-V/7-AAD positive cells following  
362 the combination treatment, compared to single treatment alone groups. In contrast, the  
363 2DG/Trametinib combination failed to induce apoptosis in IMR90 cells (Fig. 4H).

### 364 **2DG and MEK inhibition synergistically induces apoptosis through ER stress**

365 To gain molecular insight into the mechanisms underlying the synergy between 2DG and  
366 MAPK inhibition, transcriptomic analysis with RNAseq was conducted in the iKras/p53 tumor  
367 cells treated with Trametinib, 2DG or in combination. By using a cut-off of fold change>2 and  
368  $p<0.01$ , a total of 850 up-regulated and 310 down-regulated genes were identified from three  
369 treatment groups compared to vehicle control group (Fig. S4A and S4B). IPA analysis of the  
370 430 differentially expressed genes (308 up and 112 down) in the Trametinib group indicated  
371 the enrichment of signaling pathways such as the sirtuin signaling pathway (Fig. 5A). On the  
372 other hand, the 209 differentially expressed genes (177 up and 32 down) from the 2DG-treated  
373 group were enriched in metabolism pathways such as N-acetylglucosamine degradation (Fig.

374 5B). The largest number of differentially expressed genes were identified in the combination  
375 treatment group, including 526 up- and 210 down-regulated genes. The top two enriched  
376 pathways are autophagosome maturation and unfold protein response (UPR), which are not  
377 among the top enriched pathways in the single treatment groups, implicating the relevance to  
378 the apoptosis induced by the combination therapy (Fig. 5C).

379 Transmission Electron Microscope (TEM) revealed swollen ER in 2DG/Trametinib-  
380 treated iKras/p53 tumor cells (Fig. 5D), a morphology change indicating the induction of UPR.  
381 The activation of UPR was further supported by the drastic upregulation of ER stress markers,  
382 including ATF4, ATF6 and BIP, following 2DG/Trametinib treatment compared with vehicle  
383 control of single treatment groups (Fig. 5E-F). Moreover, CHOP, a well-known apoptosis  
384 activator downstream of UPR, along with cleaved caspase 3, was also specifically upregulated  
385 by the combination treatment in iKras/p53 tumor cells (Fig. 5E-F), indicating 2DG and MEK  
386 inhibition results in lethal ER Stress in PDAC cells. Interestingly, no induction of ER stress  
387 markers or cleaved caspase 3 was observed in 2DG/Trametinib-treated IMR90 cells (Fig. S4C).  
388 To further validate if unfold protein response is responsible for the induction of apoptosis by  
389 the combined 2DG and Trametinib treatment, cells were treated with the chemical chaperon  
390 PBA to decrease the UPR. As expected, PBA inhibited the induction of multiple ER-stress  
391 markers, such as BIP, ATF4, and phosphor-EIF2  $\alpha$ . Importantly, PBA treatment dramatically  
392 decreased the expression of CHOP, prevented caspase-3 cleavage and suppressed apoptosis  
393 induced by 2DG and Trametinib treatment (Fig. 5G-H), indicating the cell death induced by  
394 the combination treatment is mediated by hyper-activation of UPR.

## 395 **Trametinib in combination with 2DG exhibits antitumor activity in vivo**

396 Next, we sought to evaluate the therapeutic potential of the combination in vivo. Briefly,  
397 the mouse iKras/p53 PDAC cells or PDX-derived human PDAC cells were injected  
398 subcutaneously into the immune-deficient mice. Tumor-bearing mice were treated with 2DG  
399 (1000mg/kg/d), Trametinib (1 mg/kg/d) or combination. Compared with single treatment group,  
400 combination group exhibited significant decrease in tumor size for both human and mouse  
401 PDAC (Fig. 6A-B). Moreover, we also evaluated the effect of the combination in the GEMM  
402 (iKras/p53<sup>L/+</sup>). After 7 weeks' induction of KRAS<sup>G12D</sup> expression with doxycycline, a time  
403 point previously showed to induce invasive carcinoma (14), the mice were randomized into  
404 four groups, including Vehicle control, Trametinib, 2DG, and Combo groups. While single  
405 treatment failed to elicit anti-tumor effect, combination treatment significantly prolonged  
406 overall survival (Fig. 6C). Immunohistochemistry revealed that the percentage of ki67 positive  
407 cells was significantly decreased in the combo-treated tumors compared to the single treatment  
408 groups, indicating inhibition of tumor cell proliferation (Fig. 6D and 6F). More importantly,  
409 BIP expression and percentage of cleaved Caspase-3 positive cells were significantly  
410 upregulated in the tumors treated with 2D/Trametinib combination (Fig. 6D and 6E),  
411 supporting the induction of UPR-related apoptosis.

## 412 **Discussion**

413 As the major surrogates of KRAS signaling, the roles of MAPK and PI3K pathway in  
414 KRAS-driven tumors have been extensively studied. Mutations of BRAF, a dominant mediator  
415 for oncogenic KRAS signaling to activate MAPK signaling (30), were found to be mutually

416 exclusive with the KRAS mutations in PDAC (5). Pancreatic-specific expression of oncogenic  
417 *Braf*<sup>V600E</sup> is sufficient to induce intraepithelial neoplasia (PanIN) lesions and invasive PDA in  
418 the autochthonous models (9). Moreover, CRAF has been shown to be essential for  
419 development of KRAS-driven non-small cell lung carcinoma (31,32), further supporting the  
420 central role of MAPK pathway in KRAS-driven tumorigenesis. On the other hand, PI3K and  
421 PDK1 have also been shown to be critical effectors downstream of oncogenic Kras in  
422 mediating cell plasticity and PDAC development (10). These data indicate that both MPAK  
423 and PI3K pathways are essential for KRAS-mediated tumor initiation. However, the  
424 requirement of these KRAS surrogates in advanced tumors has been less clear.

425       Recent study showed that ablation of CRAF expression leads to significant tumor  
426 regression in advanced tumors driven by KRAS<sup>G12V</sup>/Trp53 mutations (11), underscoring the  
427 requirement of MAPK pathway for tumor maintenance. Here our data provide additional  
428 evidences that MAPK pathway is necessary and sufficient for PDAC maintenance whereas  
429 PI3K activation is less competent to sustain tumor growth by itself, supporting the need to  
430 target MAPK pathway in KRAS-driven tumors. However, it has been well documented that  
431 targeting MAPK alone failed to elicit therapeutic benefit in KRAS-driven tumors, likely due  
432 to the feedback activation of PI3K pathway (12,33). Although co-targeting MAPK and PI3K  
433 was able to induce tumor regression and prolong survival in PDAC GEMM (12,13), the  
434 combination is too toxic to be tolerant in human patients (34). Previous studies have identified  
435 reactivation of multiple RTKs as a prominent mechanism of adaptive resistance to MEK  
436 inhibition in KRAS-driven tumors (13,33,35). However, co-targeting multiple RTKs is

437 difficult to achieve therapeutically, pointing to the need to identify additional strategies to  
438 target PI3K or its downstream effector pathways.

439 In this study, we identified the potential role of PI3K-mediated glycolysis in the adaptive  
440 resistance to MEK inhibition in KRAS-driven PDAC. Co-targeting MAPK pathway and  
441 glycolysis with Trametinib and 2DG combination synergistically induces apoptosis in tumor  
442 cells both in vivo and in vitro. In line with our findings, recent study in BRAF-driven melanoma  
443 showed that glycolysis inhibitors were able to potentiate the effects of Braf inhibitor (36).  
444 Although MAPK signaling has been shown to mediate the transcription of multiple glycolysis  
445 genes downstream of oncogenic KRAS (14,17), here we showed that feedback activation of  
446 PI3K pathway is sufficient to maintain glycolysis flux in KRAS-driven tumors following  
447 MAPK inhibition. PI3K has been shown to be a master regulator for the transcription of glucose  
448 transporters (37). PI3K can also activate glycolysis at post-translational level by controlling  
449 the cytoskeleton remodeling and thus relieving the sequestration of glycolysis enzymes (38).  
450 Whether such mechanisms are also involved in the feedback activation of glycolysis upon  
451 MEK inhibition in KRAS-driven tumor cells remains to be elucidated.

452 Our data indicates that the maintenance of glycolysis activity is essential for the survival of  
453 PDAC cells following the inhibition of MAPK signaling. Blocking glycolysis with 2DG in  
454 combination with MAPK inhibition leads to induction of apoptosis. 2DG, a derivative of  
455 glucose, could be phosphorylated to 2DG-6-phosphate in cell. The accumulated 2DG-6-  
456 phosphate inhibits hexokinase in a noncompetitive manner (39) and can lead to the inhibition  
457 of multiple anabolic processes branched from glycolysis pathway. It's possible that the synergy

458 between 2DG and MAPK inhibition is due the blockade of multiple glucose-dependent  
459 metabolism pathways. Among them, 2DG has been shown to impair the pentose-phosphate  
460 pathway (PPP) and dramatically decreases R5P level (40). Interestingly, recent study has  
461 shown that the activation of PPP-mediated ribose metabolism is critical for the adaptation to  
462 the inhibition of KRAS signaling in PDAC cells (17). In addition, 2DG treatment has been  
463 shown to induce ER stress, likely due to its impact on HBP or mannose metabolism (41,42).  
464 While UPR is considered as a survival mechanism to maintain protein homeostasis, excessive  
465 ER stress will result in cell death (43,44). Here, we provide evidence that the combination of  
466 2DG and MAPK inhibition dramatically amplified the ER stress in PDAC cells which results  
467 in apoptosis. This is supported by our finding that the cell death was partially rescued with  
468 chemical chaperon that mitigates the UPR. Therefore, our data indicates that the maintenance  
469 of protein homeostasis is critical for the survival of KRAS-driven PDAC cells upon the  
470 inhibition of MAPK signaling. It will be interesting to evaluate whether targeting additional  
471 regulators of protein homeostasis may also sensitize PDAC cells to MAPK inhibition.

472 Overall, our study provides evidence supporting the potential of co-targeting glycolysis  
473 and MAPK has an alternative approach to treat KRAS-driven PDAC.

474

## 475 **Acknowledgment**

476 We thank the Institute for Applied Cancer Science for sharing reagents. We would like to thank  
477 Small Animal Imaging Facility, Histopathology Core, High Resolution Electron Microscopy  
478 Facility, the Flow Cytometry and Cellular Imaging Core at The University of Texas MD

479 Anderson Cancer Center, and the Veterinary Medicine Department at MD Anderson (Cancer  
480 Center Support Grant CA016672). We thank Costas A. Lyssiotis for his suggestion and  
481 supports on the cell metabolism analysis. The research was supported by the National Cancer  
482 Institute (NCI) grant R01CA214793 and NCI P01 grant P01CA117969 to HY, and the  
483 Pancreatic Cancer Action Network-American Association for Cancer Research Pathway to  
484 Leadership Award to WY.



## 485 **References**

- 486 1. Rahib L, Smith BD, Aizenberg R, Rosenzweig AB, Fleshman JM, Matrisian LM. Projecting cancer  
487 incidence and deaths to 2030: the unexpected burden of thyroid, liver, and pancreas cancers in  
488 the United States. *Cancer Res* **2014**;74:2913-21
- 489 2. Siegel RL, Miller KD, Jemal A. Cancer statistics, 2020. *CA Cancer J Clin* **2020**;70:7-30
- 490 3. Cox AD, Fesik SW, Kimmelman AC, Luo J, Der CJ. Drugging the undruggable RAS: Mission possible?  
491 *Nat Rev Drug Discov* **2014**;13:828-51
- 492 4. Canon J, Rex K, Saiki AY, Mohr C, Cooke K, Bagal D, *et al.* The clinical KRAS(G12C) inhibitor AMG  
493 510 drives anti-tumour immunity. *Nature* **2019**;575:217-23
- 494 5. Witkiewicz AK, McMillan EA, Balaji U, Baek G, Lin WC, Mansour J, *et al.* Whole-exome sequencing  
495 of pancreatic cancer defines genetic diversity and therapeutic targets. *Nature communications*  
496 **2015**;6:6744
- 497 6. Downward J. Targeting RAS signalling pathways in cancer therapy. *Nature reviews Cancer*  
498 **2003**;3:11-22
- 499 7. Bryant KL, Mancias JD, Kimmelman AC, Der CJ. KRAS: feeding pancreatic cancer proliferation.  
500 *Trends Biochem Sci* **2014**;39:91-100
- 501 8. Rodriguez-Viciano P, Warne PH, Khwaja A, Marte BM, Pappin D, Das P, *et al.* Role of  
502 phosphoinositide 3-OH kinase in cell transformation and control of the actin cytoskeleton by Ras.  
503 *Cell* **1997**;89:457-67
- 504 9. Collisson EA, Trejo CL, Silva JM, Gu S, Korkola JE, Heiser LM, *et al.* A central role for RAF-->MEK-  
505 -->ERK signaling in the genesis of pancreatic ductal adenocarcinoma. *Cancer discovery*  
506 **2012**;2:685-93
- 507 10. Eser S, Reiff N, Messer M, Seidler B, Gottschalk K, Dobler M, *et al.* Selective requirement of  
508 PI3K/PDK1 signaling for Kras oncogene-driven pancreatic cell plasticity and cancer. *Cancer Cell*  
509 **2013**;23:406-20
- 510 11. Sanclemente M, Francoz S, Esteban-Burgos L, Bousquet-Mur E, Djurec M, Lopez-Casas PP, *et al.*  
511 c-RAF Ablation Induces Regression of Advanced Kras/Trp53 Mutant Lung Adenocarcinomas by a  
512 Mechanism Independent of MAPK Signaling. *Cancer Cell* **2018**;33:217-28 e4
- 513 12. Alagesan B, Contino G, Guimaraes AR, Corcoran RB, Deshpande V, Wojtkiewicz GR, *et al.*  
514 Combined MEK and PI3K inhibition in a mouse model of pancreatic cancer. *Clin Cancer Res*  
515 **2015**;21:396-404
- 516 13. Pettazoni P, Viale A, Shah P, Carugo A, Ying H, Wang H, *et al.* Genetic events that limit the efficacy  
517 of MEK and RTK inhibitor therapies in a mouse model of KRAS-driven pancreatic cancer. *Cancer*  
518 *research* **2015**;75:1091-101
- 519 14. Ying H, Kimmelman AC, Lyssiotis CA, Hua S, Chu GC, Fletcher-Sananikone E, *et al.* Oncogenic Kras  
520 maintains pancreatic tumors through regulation of anabolic glucose metabolism. *Cell*  
521 **2012**;149:656-70
- 522 15. Bryant KL, Stalneck CA, Zeitouni D, Klomp JE, Peng S, Tikunov AP, *et al.* Combination of ERK and  
523 autophagy inhibition as a treatment approach for pancreatic cancer. *Nat Med* **2019**;25:628-40
- 524 16. Kinsey CG, Camolotto SA, Boespflug AM, Guillen KP, Foth M, Truong A, *et al.* Protective autophagy  
525 elicited by RAF-->MEK-->ERK inhibition suggests a treatment strategy for RAS-driven cancers.  
526 *Nat Med* **2019**;25:620-7

- 527 17. Santana-Codina N, Roeth AA, Zhang Y, Yang A, Mashadova O, Asara JM, *et al.* Oncogenic KRAS  
528 supports pancreatic cancer through regulation of nucleotide synthesis. *Nat Commun* **2018**;9:4945
- 529 18. Chauhan SC, Ebeling MC, Maher DM, Koch MD, Watanabe A, Aburatani H, *et al.* MUC13 mucin  
530 augments pancreatic tumorigenesis. *Molecular cancer therapeutics* **2012**;11:24-33
- 531 19. Auciello FR, Bulusu V, Oon C, Tait-Mulder J, Berry M, Bhattacharyya S, *et al.* A Stromal Lysolipid-  
532 Autotaxin Signaling Axis Promotes Pancreatic Tumor Progression. *Cancer discovery* **2019**
- 533 20. Yao W, Rose JL, Wang W, Seth S, Jiang H, Taguchi A, *et al.* Syndecan 1 is a critical mediator of  
534 macropinocytosis in pancreatic cancer. *Nature* **2019**;568:410-4
- 535 21. Carugo A, Genovese G, Seth S, Nezi L, Rose JL, Bossi D, *et al.* In Vivo Functional Platform Targeting  
536 Patient-Derived Xenografts Identifies WDR5-Myc Association as a Critical Determinant of  
537 Pancreatic Cancer. *Cell Rep* **2016**;16:133-47
- 538 22. Aguirre AJ, Bardeesy N, Sinha M, Lopez L, Tuveson DA, Horner J, *et al.* Activated Kras and Ink4a/Arf  
539 deficiency cooperate to produce metastatic pancreatic ductal adenocarcinoma. *Genes Dev*  
540 **2003**;17:3112-26
- 541 23. White MA, Nicolette C, Minden A, Polverino A, Van Aelst L, Karin M, *et al.* Multiple Ras functions  
542 can contribute to mammalian cell transformation. *Cell* **1995**;80:533-41
- 543 24. Fiordalisi JJ, Holly SP, Johnson RL, 2nd, Parise LV, Cox AD. A distinct class of dominant negative  
544 Ras mutants: cytosolic GTP-bound Ras effector domain mutants that inhibit Ras signaling and  
545 transformation and enhance cell adhesion. *J Biol Chem* **2002**;277:10813-23
- 546 25. Boehm JS, Zhao JJ, Yao J, Kim SY, Firestein R, Dunn IF, *et al.* Integrative genomic approaches  
547 identify IKBKE as a breast cancer oncogene. *Cell* **2007**;129:1065-79
- 548 26. Infante JR, Somer BG, Park JO, Li CP, Scheulen ME, Kasubhai SM, *et al.* A randomised, double-  
549 blind, placebo-controlled trial of trametinib, an oral MEK inhibitor, in combination with  
550 gemcitabine for patients with untreated metastatic adenocarcinoma of the pancreas. *Eur J Cancer*  
551 **2014**;50:2072-81
- 552 27. Van Cutsem E, Hidalgo M, Canon JL, Macarulla T, Bazin I, Poddubskaya E, *et al.* Phase I/II trial of  
553 pimasertib plus gemcitabine in patients with metastatic pancreatic cancer. *Int J Cancer*  
554 **2018**;143:2053-64
- 555 28. Kasuga A, Nakagawa K, Nagashima F, Shimizu T, Naruge D, Nishina S, *et al.* A phase I/Ib study of  
556 trametinib (GSK1120212) alone and in combination with gemcitabine in Japanese patients with  
557 advanced solid tumors. *Invest New Drugs* **2015**;33:1058-67
- 558 29. Kwong LN, Costello JC, Liu H, Jiang S, Helms TL, Langsdorf AE, *et al.* Oncogenic NRAS signaling  
559 differentially regulates survival and proliferation in melanoma. *Nat Med* **2012**;18:1503-10
- 560 30. Cseh B, Doma E, Baccarini M. "RAF" neighborhood: protein-protein interaction in the Raf/Mek/Erk  
561 pathway. *FEBS letters* **2014**;588:2398-406
- 562 31. Karreth FA, Frese KK, DeNicola GM, Baccarini M, Tuveson DA. C-Raf is required for the initiation  
563 of lung cancer by K-Ras(G12D). *Cancer Discov* **2011**;1:128-36
- 564 32. Blasco RB, Francoz S, Santamaria D, Canamero M, Dubus P, Charron J, *et al.* c-Raf, but not B-Raf,  
565 is essential for development of K-Ras oncogene-driven non-small cell lung carcinoma. *Cancer*  
566 *Cell* **2011**;19:652-63
- 567 33. Manchado E, Weissmueller S, Morris JPt, Chen CC, Wullenkord R, Lujambio A, *et al.* A combinatorial  
568 strategy for treating KRAS-mutant lung cancer. *Nature* **2016**;534:647-51

- 569 34. Do K, Speranza G, Bishop R, Khin S, Rubinstein L, Kinders RJ, *et al.* Biomarker-driven phase 2 study  
570 of MK-2206 and selumetinib (AZD6244, ARRY-142886) in patients with colorectal cancer. *Invest*  
571 *New Drugs* **2015**;33:720-8
- 572 35. Fedele C, Ran H, Diskin B, Wei W, Jen J, Geer MJ, *et al.* SHP2 Inhibition Prevents Adaptive Resistance  
573 to MEK Inhibitors in Multiple Cancer Models. *Cancer Discov* **2018**;8:1237-49
- 574 36. Parmenter TJ, Kleinschmidt M, Kinross KM, Bond ST, Li J, Kaadige MR, *et al.* Response of BRAF-  
575 mutant melanoma to BRAF inhibition is mediated by a network of transcriptional regulators of  
576 glycolysis. *Cancer Discov* **2014**;4:423-33
- 577 37. Hoxhaj G, Manning BD. The PI3K-AKT network at the interface of oncogenic signalling and cancer  
578 metabolism. *Nat Rev Cancer* **2020**;20:74-88
- 579 38. Hu H, Juvekar A, Lyssiotis CA, Lien EC, Albeck JG, Oh D, *et al.* Phosphoinositide 3-Kinase Regulates  
580 Glycolysis through Mobilization of Aldolase from the Actin Cytoskeleton. *Cell* **2016**;164:433-46
- 581 39. Chen W, Gueron M. The inhibition of bovine heart hexokinase by 2-deoxy-D-glucose-6-  
582 phosphate: characterization by <sup>31</sup>P NMR and metabolic implications. *Biochimie* **1992**;74:867-73
- 583 40. Ralser M, Wamelink MM, Struys EA, Joppich C, Krobitsch S, Jakobs C, *et al.* A catabolic block does  
584 not sufficiently explain how 2-deoxy-D-glucose inhibits cell growth. *Proc Natl Acad Sci U S A*  
585 **2008**;105:17807-11
- 586 41. Xi H, Kurtoglu M, Liu H, Wangpaichitr M, You M, Liu X, *et al.* 2-Deoxy-D-glucose activates  
587 autophagy via endoplasmic reticulum stress rather than ATP depletion. *Cancer Chemother*  
588 *Pharmacol* **2011**;67:899-910
- 589 42. Ishino K, Kudo M, Peng WX, Kure S, Kawahara K, Teduka K, *et al.* 2-Deoxy-d-glucose increases  
590 GFAT1 phosphorylation resulting in endoplasmic reticulum-related apoptosis via disruption of  
591 protein N-glycosylation in pancreatic cancer cells. *Biochem Biophys Res Commun* **2018**;501:668-  
592 73
- 593 43. Sano R, Reed JC. ER stress-induced cell death mechanisms. *Biochim Biophys Acta* **2013**;1833:3460-  
594 70
- 595 44. Szegezdi E, Logue SE, Gorman AM, Samali A. Mediators of endoplasmic reticulum stress-induced  
596 apoptosis. *EMBO Rep* **2006**;7:880-5

597

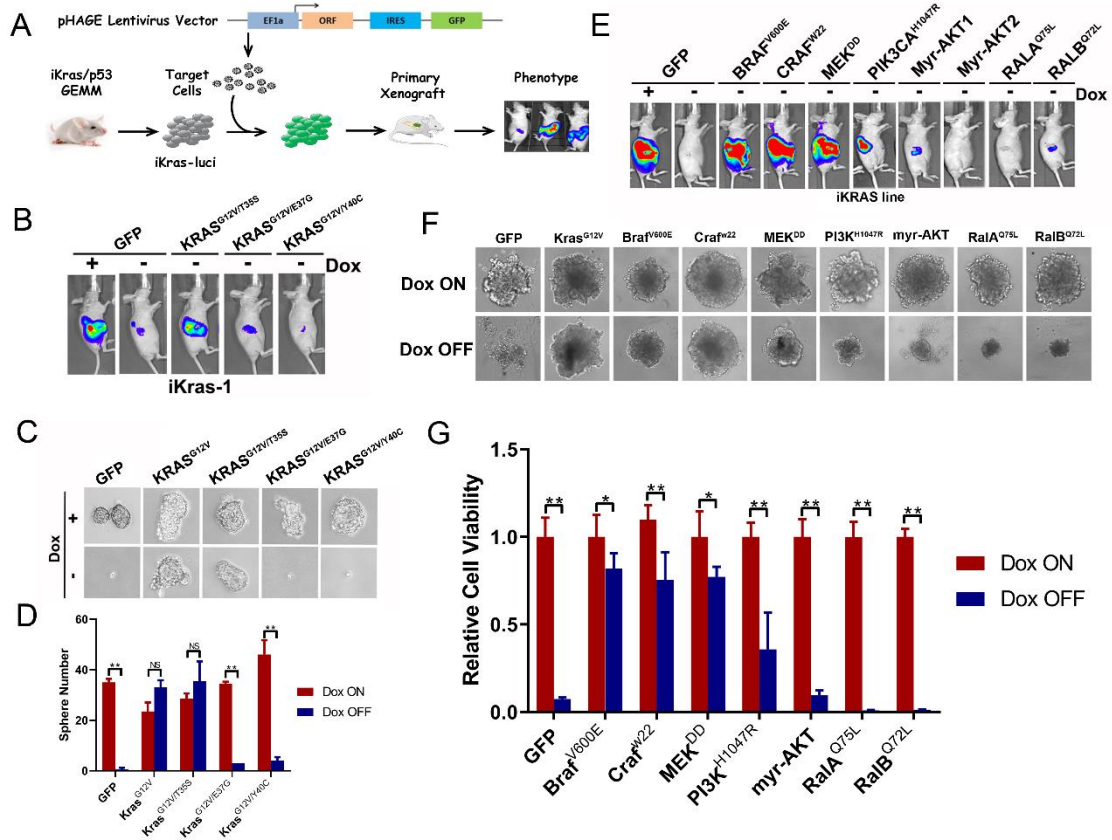

598

599 **Figure 1. Active MAPK pathway is essential for PDAC maintenance**

600 (A) Schematic diagram of investigating KRAS downstream surrogates in PDAC maintenance. The  
 601 iKras cell was infected with lentivirus to overexpress the KRAS surrogates, sorted and orthotopically  
 602 injected into nude mouse. Tumorigenesis was observed by bioluminescence imaging. (B)  
 603 Tumorigenesis of iKras cells with  $Kras^{G12V/T35S}$ ,  $Kras^{G12V/E37G}$  or  $Kras^{G12V/Y40C}$  overexpression by  
 604 bioluminescence imaging. (C) Sphere formation of iKras cell with  $Kras^{G12V/T35S}$ ,  $Kras^{G12V/E37G}$ ,  
 605  $Kras^{G12V/Y40C}$  overexpression in the low-attached plate. (D) Quantification of sphere number in C (n=3,  
 606 Mean ± SD). (E) Tumorigenesis of mouse PDAC cells with constitutively active KRAS downstream  
 607 surrogates by bioluminescence imaging. (F) Sphere formation of iKras PDAC cells with constitutively  
 608 active KRAS downstream surrogates in low attached plate. (G) Quantification of spheres in F by cell  
 609 viability assay (n=3, Mean ± SD).

610

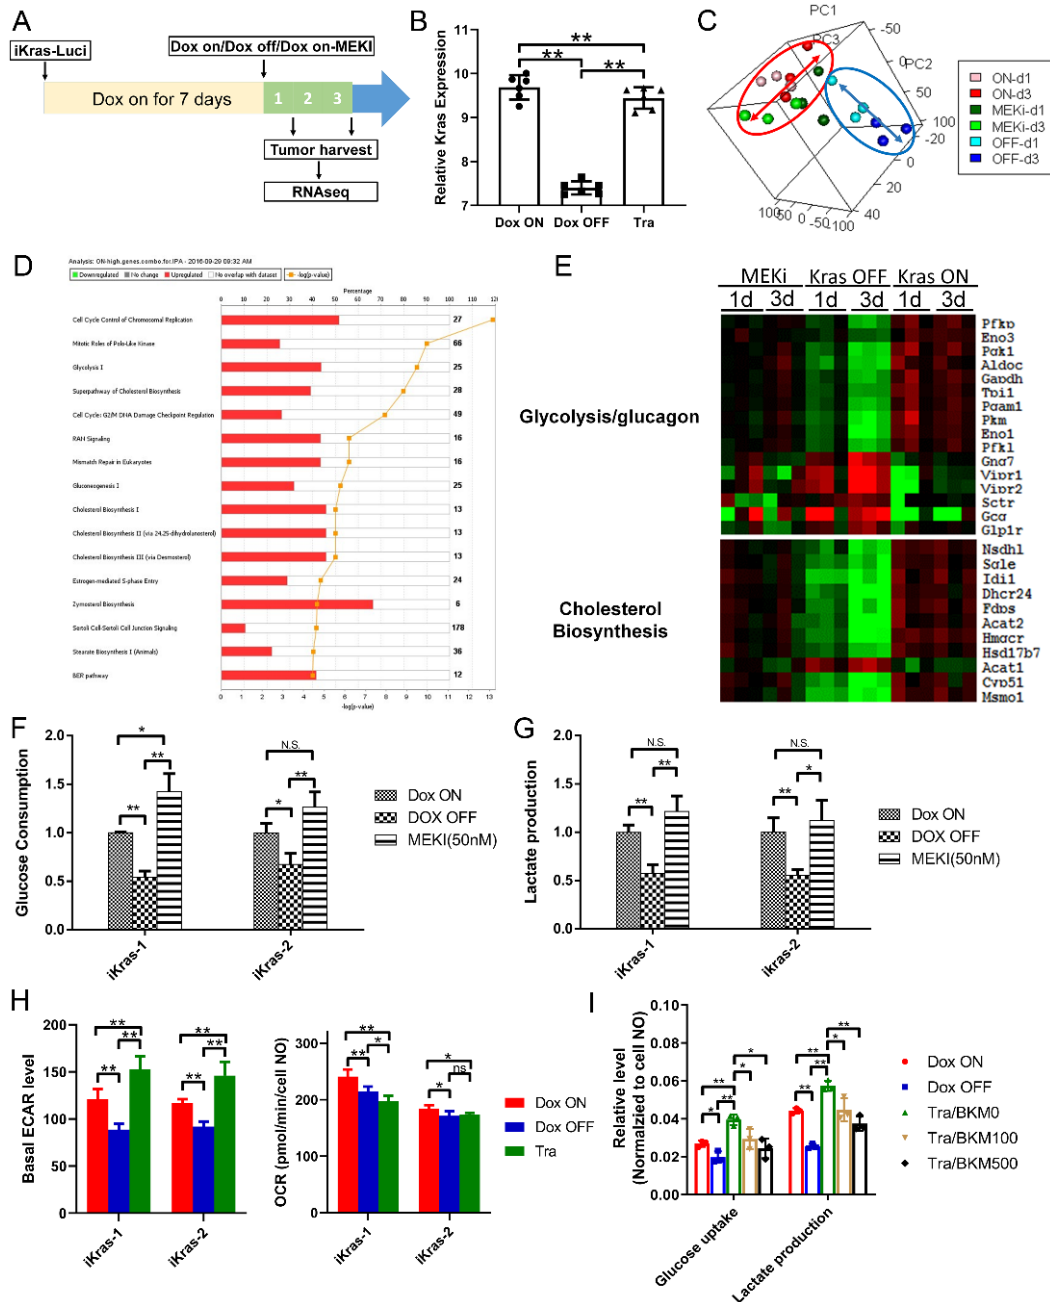

611

612 **Figure 2. MEK inhibition fails to recapitulate glycolysis inhibition by Kras inactivation.**

613 (A) Schematic illustration of transcriptomic analysis between xenograft upon Dox ON, Dox OFF  
 614 or TRA treatment in vivo. Seven days post orthotopic injection of iKras cells, the mice were randomized  
 615 into three group (Dox ON, Dox OFF or treated with 1 mg/kg/day TRA) and xenograft tumors were  
 616 collected after 1- or 3-days treatment. (B) Kras expression in the xenograft upon Dox ON, Dox OFF or  
 617 TRA treatment by RNA-seq (n=5, Mean ± SD). (C) PCA analysis of transcriptome changes between  
 618 Dox ON, Dox OFF or TRA treatment. (D) IPA pathway analysis of differentially expressed genes  
 619 between Dox OFF and TRA treatment. (E) Heatmap of the representative differentially expressed genes  
 620 in respective pathway. (F-G) Glucose consumption and lactate production of iKras cells with Dox ON,  
 621 Dox OFF or TRA treatment by YSI (n=3, Mean ± SD). Expression validation of genes involved in  
 622 glycolysis by qPCR (n=3, Mean ± SD). (H) Basal ECAR or OCR value of iKras cells with Dox ON,

623 Dox OFF or TRA treatment by Seahorse (n=4, Mean  $\pm$  SD). (I) Glucose and lactate concentration in  
624 the medium of iKras cell was measured upon treatment (TRA: 25nM; BKM120: 100 nM or 500 nM)  
625 for 48h. The glucose consumption and lactate production were normalized based on cell number (n=3,  
626 Mean  $\pm$  SD).  
627

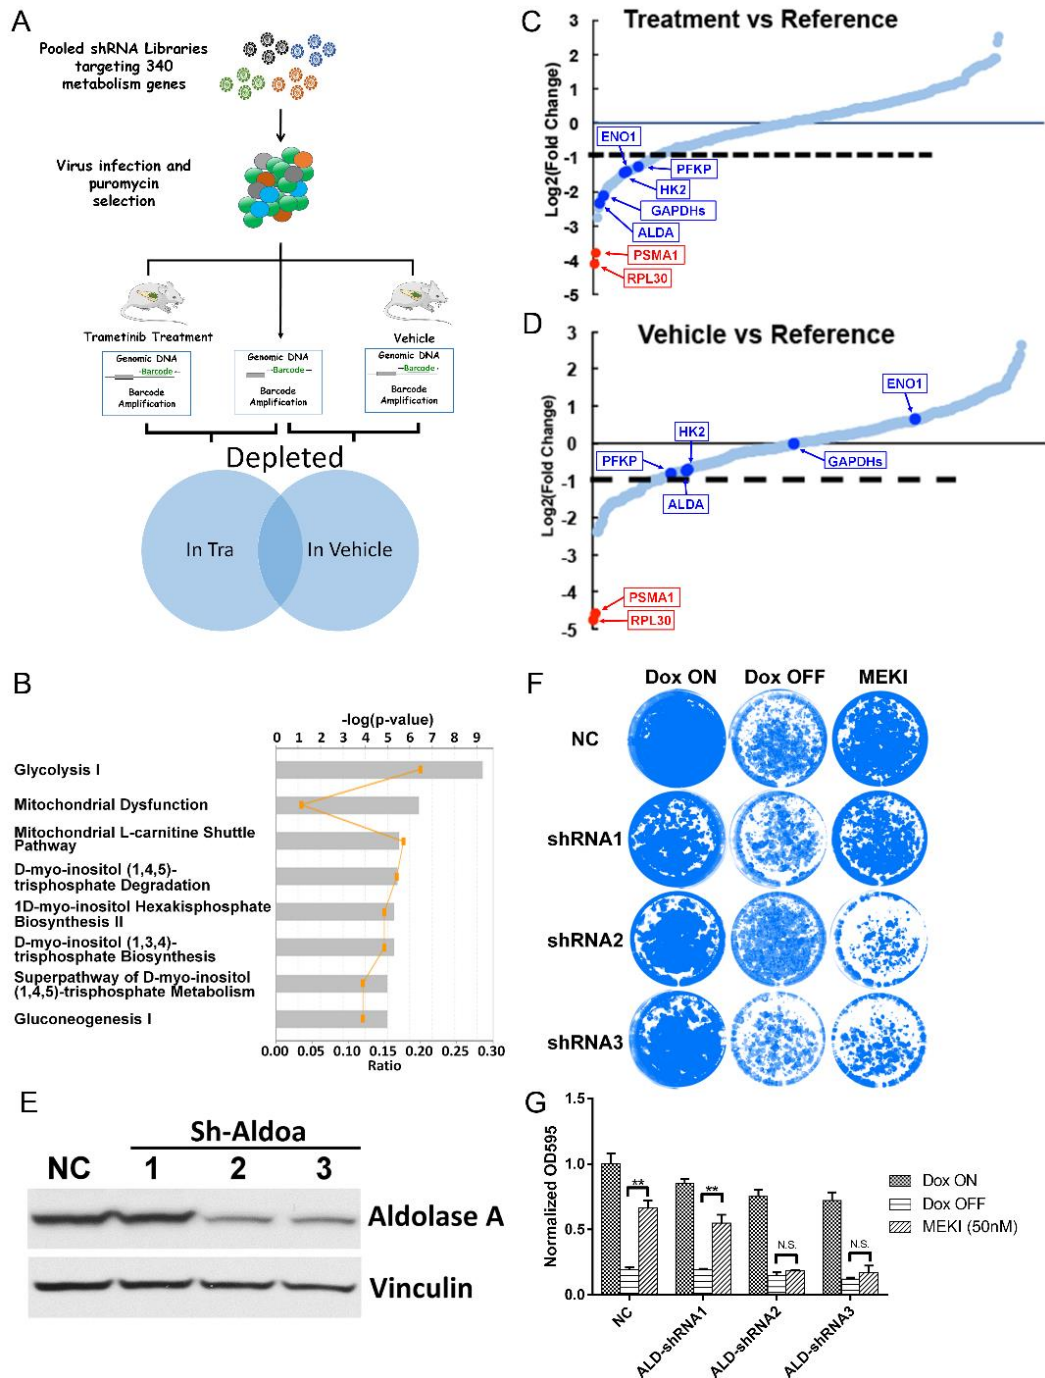

628  
629  
630

**Figure 3. Pooled shRNA library screening indicates glycolysis inhibition sensitizes iKras cells to MEK inhibition**

631 (A) Schematic illustration of pooled shRNA library screening in vivo. (B) IPA analysis of the  
632 depleted genes in shRNA library screen. (C-D) Relative abundance of each gene in the library in  
633 vehicle- or trametinib-treated tumors. Red dots: two positive control RPL30 and PSMA1; Blue Dots:  
634 five genes involved in glycolysis flux. (E) Knockdown of AldoA in iKras cell by shRNA. (F) Crystal  
635 violet staining of AldoA knockdown cell upon treatment of Dox ON, Dox OFF or 25 nM TRA for 4  
636 days. (G) Quantification of crystal violet staining in F (n=3, Mean ± SD).  
637

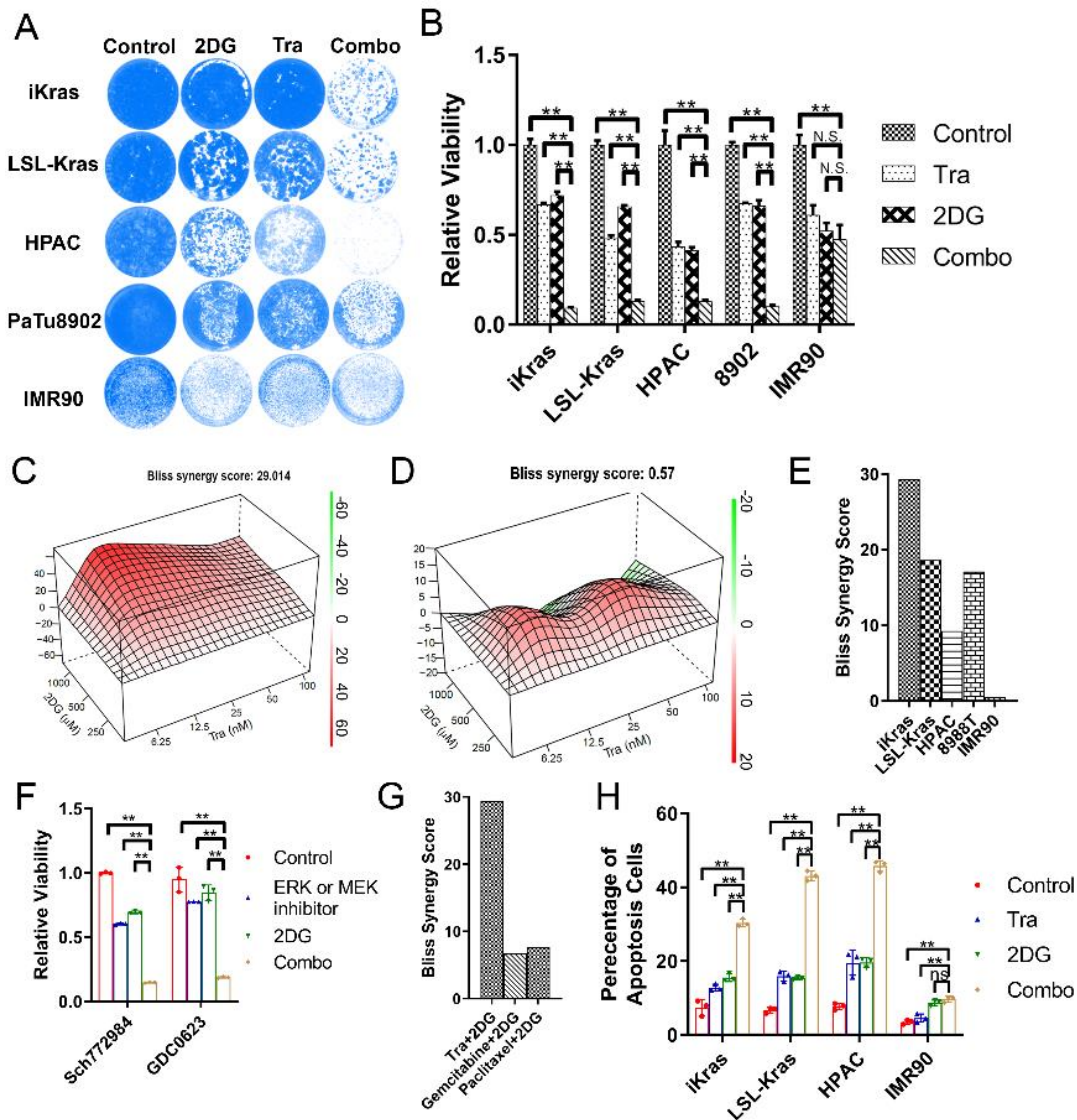

638

639 **Figure 4. TRA and 2DG has a synergistic effect to induce apoptosis in mouse or human PDAC**  
 640 **cell lines.**

641 (A) Crystal violet staining of the cells treated with 25nM TRA, 1mM 2DG or combination for 4  
 642 days. (B) Quantification of crystal violet staining in B (n=3, Mean ± SD). (C-D) Representative Bliss  
 643 score for combination of TRA and 2DG in iKras or IMR90 cell. (E) The synergistic effect of TRA and  
 644 2DG combination was analyzed using Bliss score in mouse (iKras and LSL-Kras), human PDAC line  
 645 (HPAC and 8988T) and IMR90 cell line. (F) Quantification of crystal violet staining for the cell treated  
 646 with SCH772984 (200nM)/GDC063 (100nM), 2DG (1mM) or combination (n=3, Mean ± SD). (G) The  
 647 Bliss synergy score was calculated for the combination of TRA/2DG, gemcitabine/2DG and  
 648 paclitaxel/2DG in iKras cell. (H) Apoptosis of the cell treated with 25nM TRA, 1mM 2DG or  
 649 combination by annexin V/7-AAD staining (n=3, Mean ± SD).

650

651



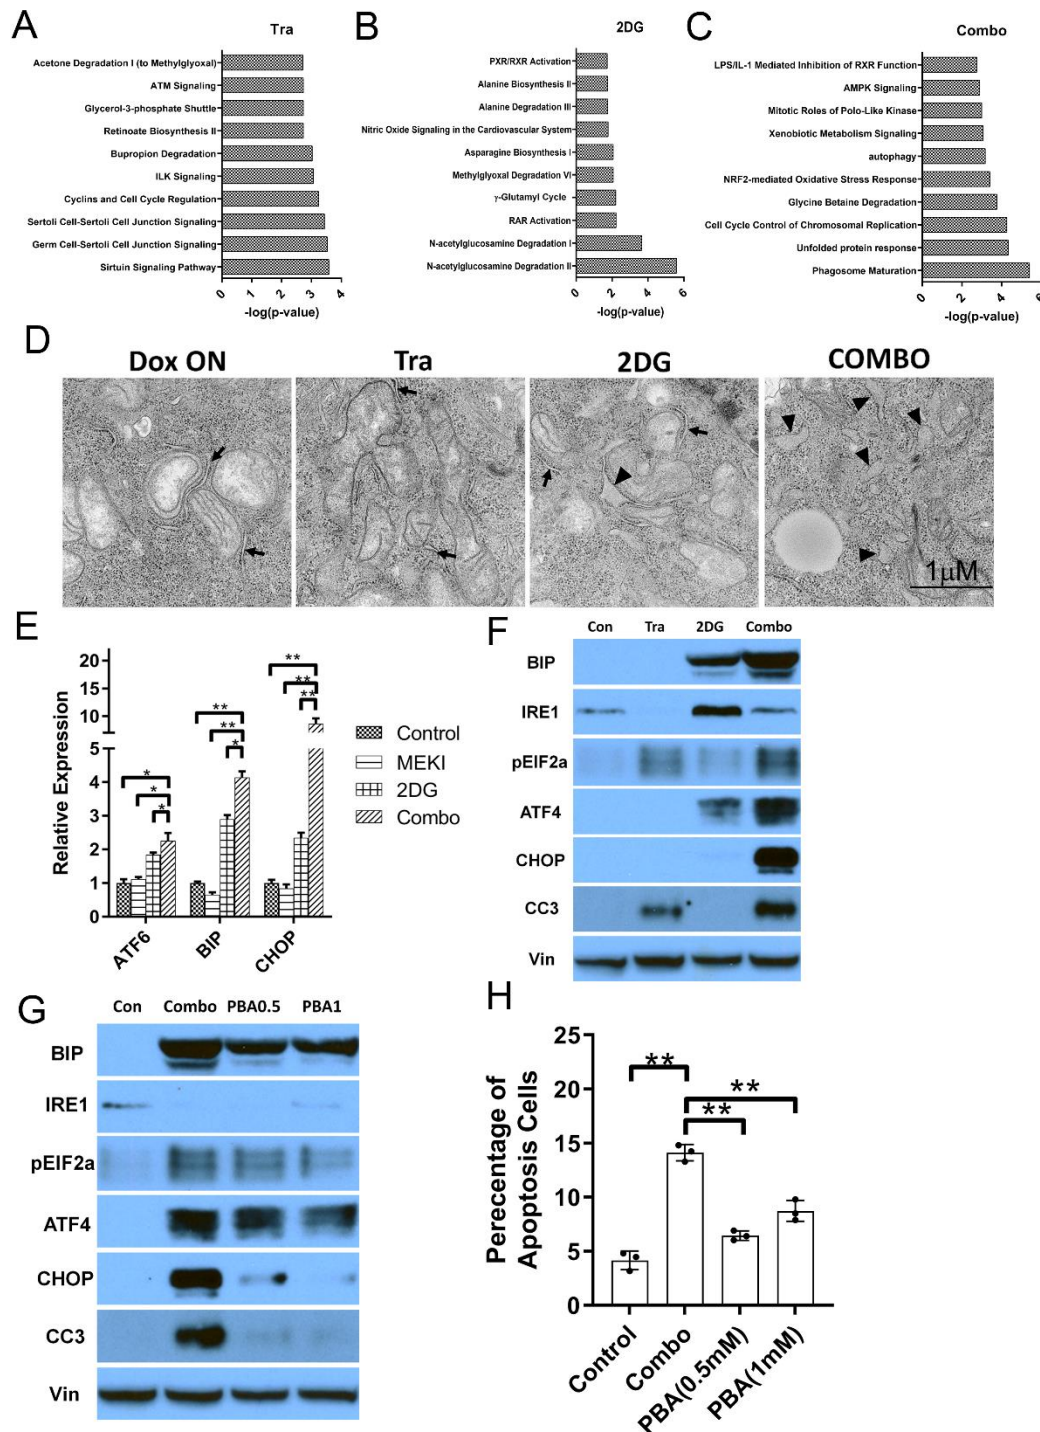

652

653

**Figure 5. 2DG and TRA has a synergy to induce ER stress in PDAC cell lines.**

654

655

656

657

658

659

660

661

(A-C) IPA analysis of differentially expressed genes in iKras lines treated with 2DG and TRA combination. (D) Representative TEM images of iKras cell treated with TRA, 2DG or Combination for 48h. The normal ER were indicated by arrow and swollen ER were indicates by arrowheads. (E-F) Expression of the ER stress markers in iKras treated with 25nM TRA, 1mM 2DG or combination for 48h detected by qPCR (E, n=3, Mean  $\pm$  SD) or WB (F). (G) Expression of the ER stress markers in iKras treated with TRA/2DG or TRA/2DG/PBA by WB. (H) Apoptosis analysis of iKras cell treated with TRA/2DG or TRA/2DG/PBA by Annexin-V staining (n=3, Mean  $\pm$  SD). TRA: 25nM; 2DG: 1mM and PBA: 0.5mM or 1mM.

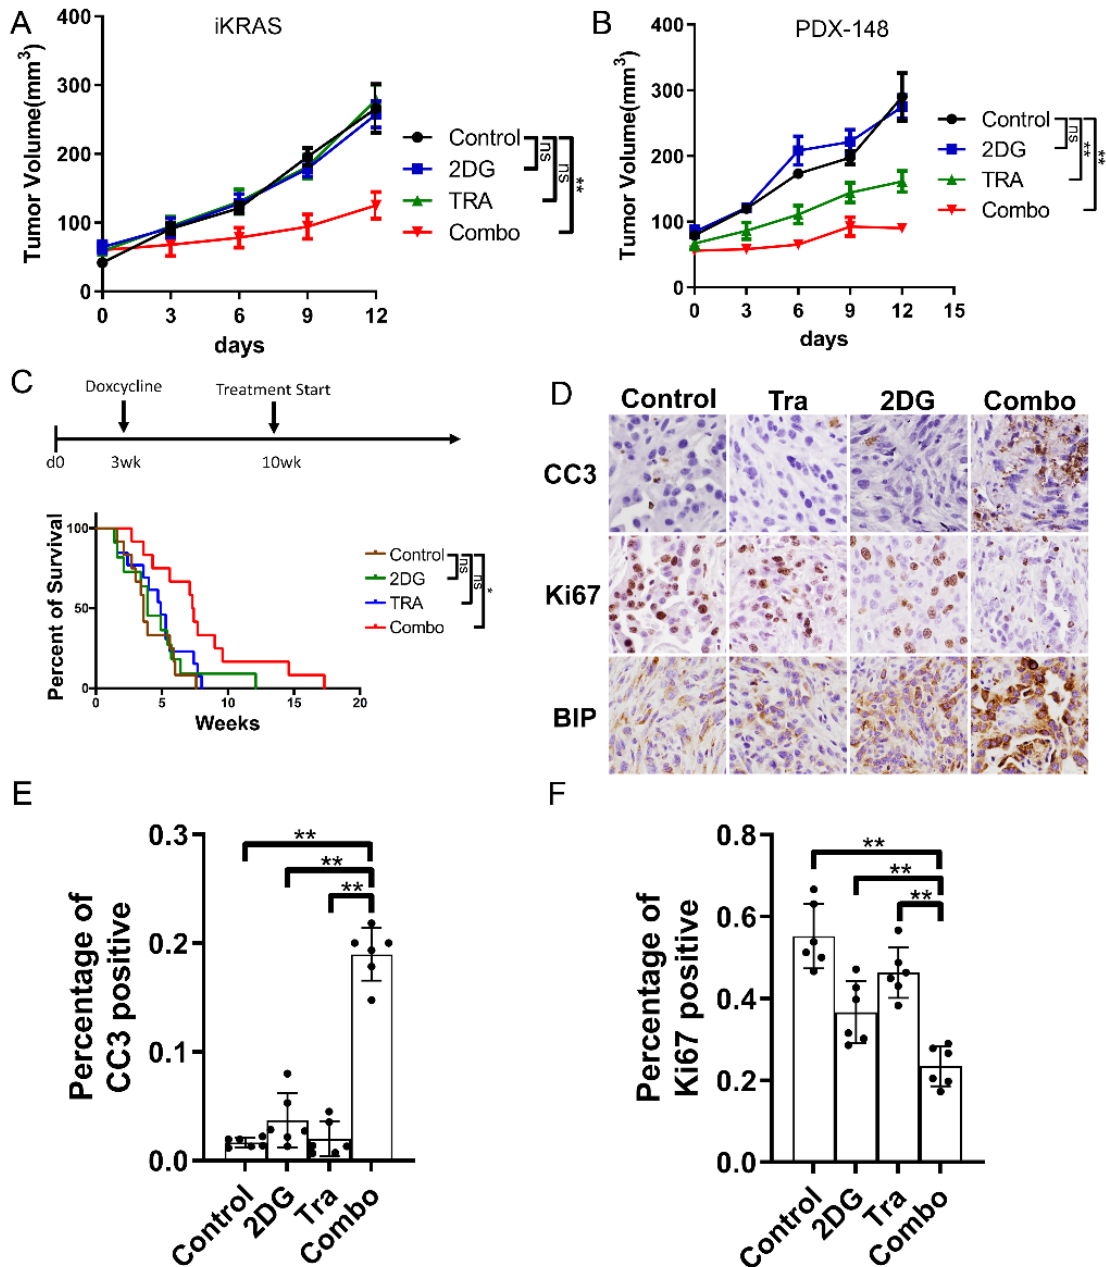

662

663 **Figure 6. 2DG and MEK inhibitor combination has a synergy to treat PDAC in vivo.**

664 (A) Xenograft tumor volume of iKras cell in nude mice treated with TRA, 2DG or Combo (n=5, Mean  
665  $\pm$  SE). TRA: 1mg/kg/day; 2DG: 1000mg/kg/d. (B) Xenograft tumor volume of PDX-148 cell in nude  
666 mice treated with TRA, 2DG or Combo (n=5, Mean  $\pm$  SE). TRA: 1mg/kg/day; 2DG: 1000mg/kg/d. (C)  
667 Kaplan–Meier survival analysis of iKras GEMM treated with vehicle, TRA, 2DG or Combo (n=12).  
668 TRA: 1mg/kg/day; 2DG: 1000mg/kg/d. (D) Representative images of immunohistochemical staining  
669 of paraffin embedded xenograft tumors using antibodies for CC3, Ki67 or BIP. (E-F) Quantification of  
670 CC3 or ki67 positive cell in D (n=6, Mean  $\pm$  SD).

671
